# Supplementary material
Source: PubMed Central journal article supplement (PMC4266726)
Supplement: ajcr0004-0943-f6.pdf [file ajcr0004-0943-f6.pdf]

# Debio 1143 enhances radiosensitization of NSCLC in vitro

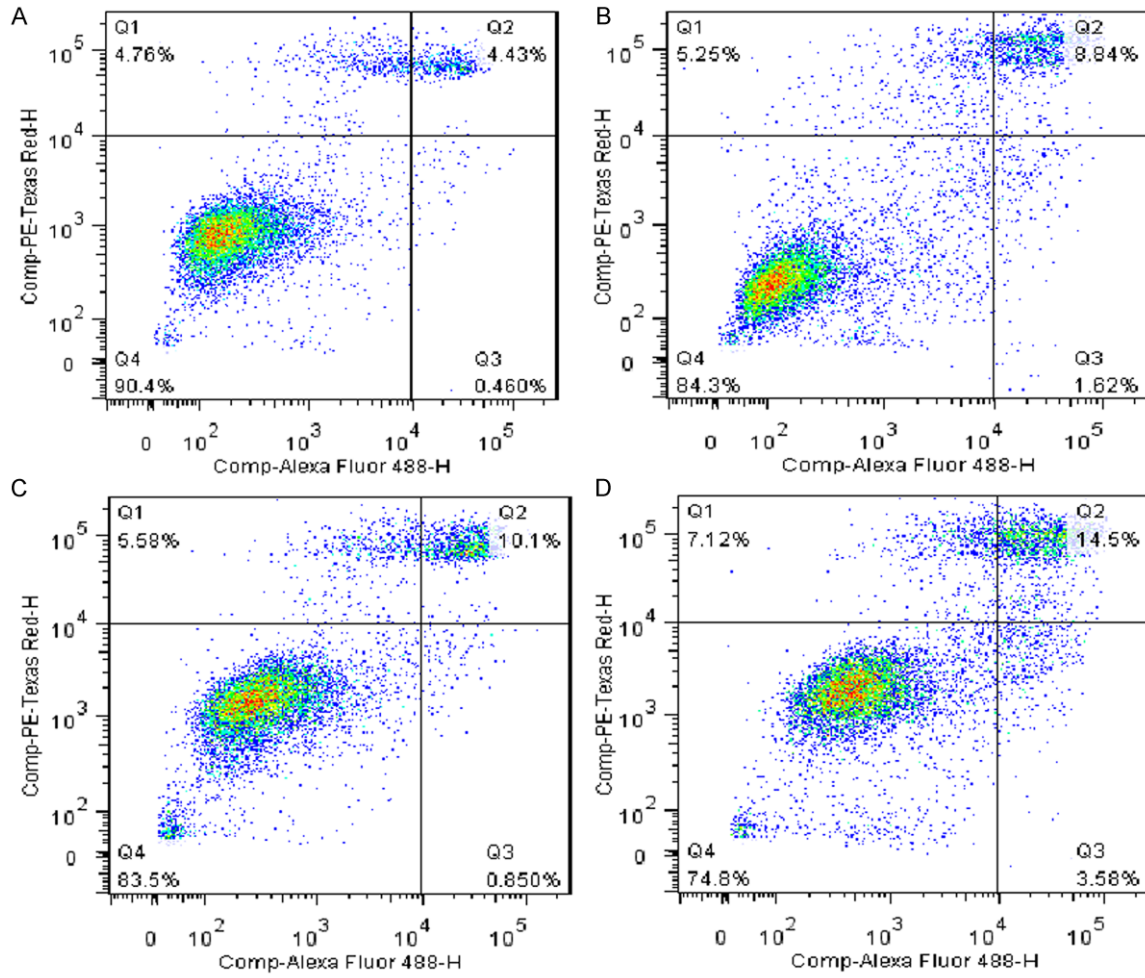

**Figure S1.** Annexin V HCC193 cell line demonstrating the different levels of cell death. (A) Control, supp. (B) 2.5  $\mu$ M D1143, (C) 5  $\mu$ M D1143, (D) 10  $\mu$ M D1143. Q1-necrotic cells, Q2-necrotic+apoptotic, Q3-apoptosis, Q4-live.
